# Supplementary material for: Theoretical studies on the spin trapping of the 2-chloro-5-hydroxy-1,4-benzoquinone radical by 5,5-dimethyl-1-pyrroline N-oxide (DMPO): the identification of the C–O bonding spin adduct
Source: Royal Society of Chemistry journal article supplement (doi:10.1039/c6ra07696c), 2016-01-01
Supplement: c6ra07696c1.pdf [file c6ra07696c1.pdf]

## Electronic supplementary information for:

### Theoretical studies on the spin trapping of 2-chloro-5-hydroxy-1,4-benzoquinone radical by 5,5-dimethyl-1-pyrroline *N*-oxide (DMPO): The identification of the C-O bonding spin adduct

Wenling Feng<sup>a</sup>, Cong Ren<sup>a</sup>, Weihua Wang<sup>\*,a</sup>, Chao Guo<sup>a</sup>, Qiao Sun<sup>b</sup>, Ping Li<sup>\*,a</sup>

<sup>a</sup> Key Laboratory of Life-Organic Analysis, School of Chemistry and Chemical Engineering, Qufu Normal University, Qufu, 273165, P. R. China

<sup>b</sup> Collaborative Innovation Center of Radiation Medicine of Jiangsu Higher Education Institutions, School for Radiological and Interdisciplinary Sciences, Soochow University, Suzhou, 215123, P. R. China

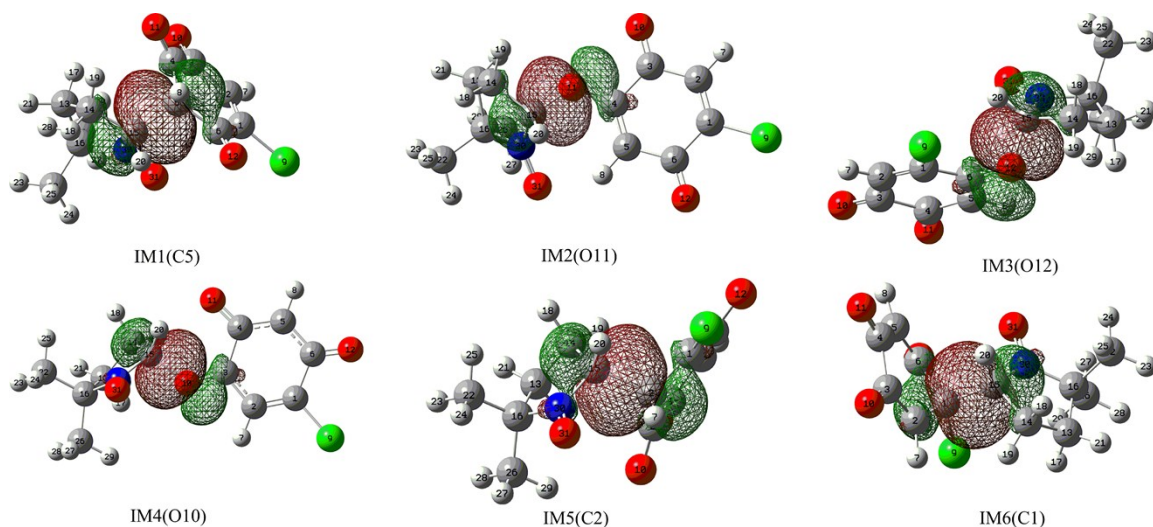

**Fig. S1** Schematic graphs of the NBO orbital associated with the interaction between DMPO and CBQ radical on the basis of the alpha orbitals. The isodensity contours are 0.004 electron/bohr<sup>3</sup>.

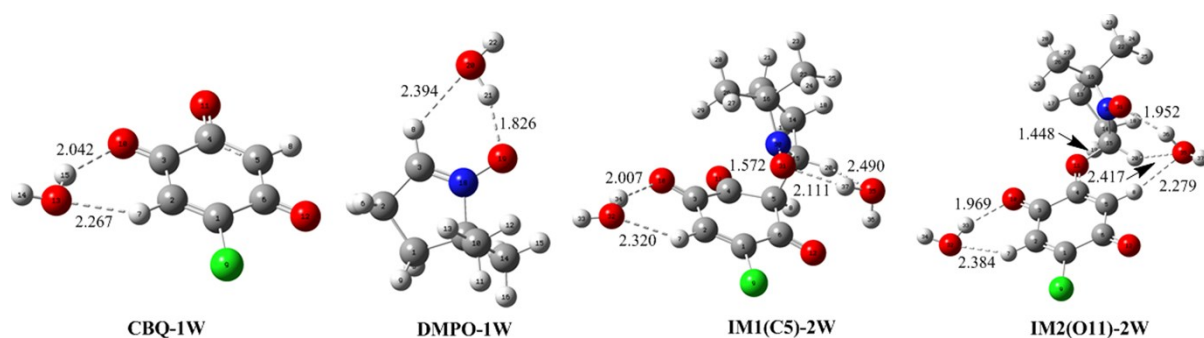

**Fig. S2** The optimized complexes of water molecule with CBQ, DMPO, IM1(C5), and IM2(O11) at the B3LYP/6-311++G(d,p) level of theory.

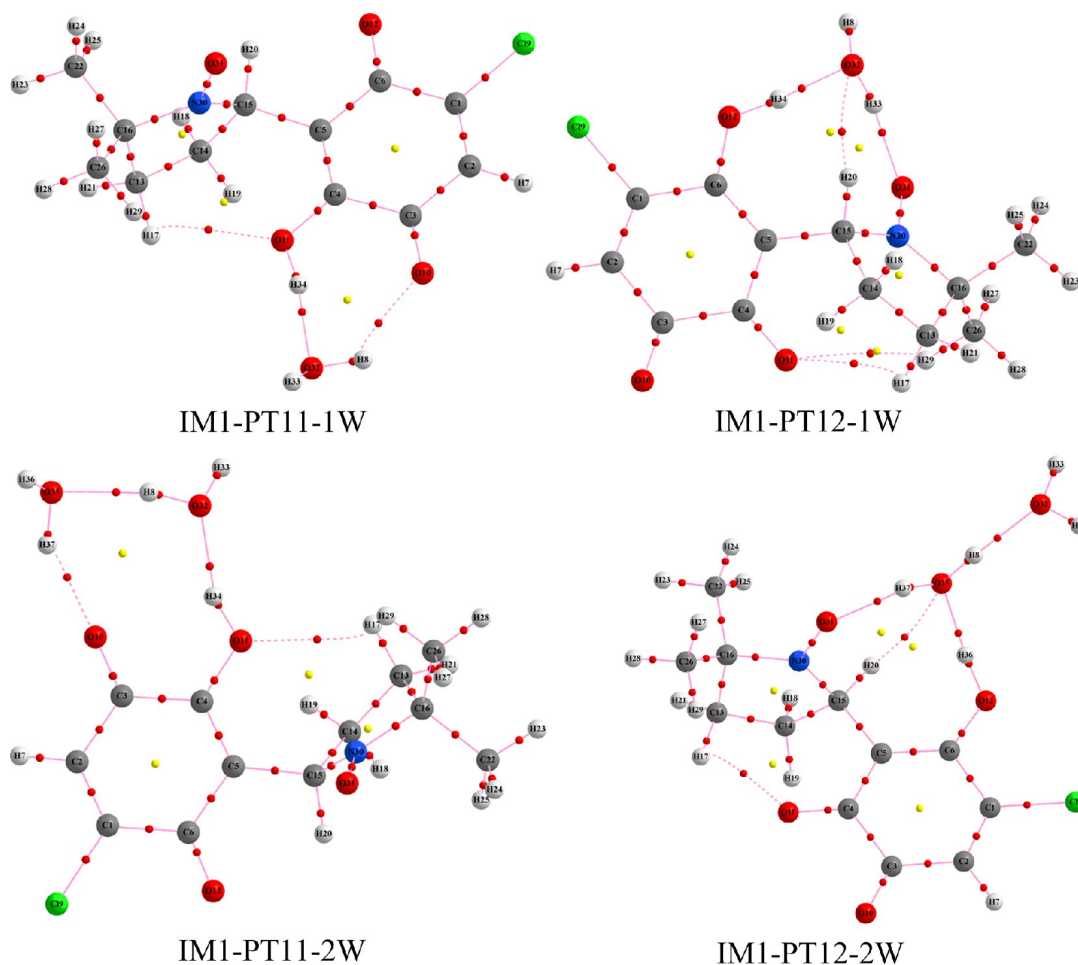

**Fig. S3** Molecular graphs of the water-assisted keto-enol tautomerization products, where the BCP and RCP are denoted as small red and yellow dots, respectively.

**Table S1** Topological analyses for the keto-enol tautomerization products of the three most stable spin adducts <sup>a</sup>

| Complexes | BCP       | $\rho_{\text{bcp}}$ | $\nabla^2\rho_{\text{bcp}}$ | $V_{\text{bcp}}$ | $G_{\text{bcp}}$ | $H_{\text{bcp}}$ |
|-----------|-----------|---------------------|-----------------------------|------------------|------------------|------------------|
| IM1-PT11  | C5 - C15  | 0.2406              | -0.5345                     | -0.2448          | 0.0556           | -0.1892          |
|           | H8 - O31  | 0.0506              | 0.1457                      | -0.0501          | 0.0433           | -0.0068          |
| IM1-PT12  | O11 - H17 | 0.0090              | 0.0313                      | -0.0058          | 0.0068           | 0.0010           |
|           | O11 - H19 | 0.0155              | 0.0572                      | -0.0104          | 0.0124           | 0.0019           |
|           | C5 - C15  | 0.2401              | -0.5287                     | -0.2449          | 0.0564           | -0.1885          |
|           | H8 - O31  | 0.0571              | 0.1409                      | -0.0566          | 0.0459           | -0.0107          |
| IM2-PT11  | O11 - C15 | 0.1993              | -0.2918                     | -0.3266          | 0.1268           | -0.1998          |
|           | O10 - H19 | 0.0146              | 0.0476                      | -0.0088          | 0.0103           | 0.0015           |
| IM2-PT12  | O11 - C15 | 0.2334              | -0.4075                     | -0.4660          | 0.1821           | -0.2839          |
| IM3-PT11  | O12 - C15 | 0.2276              | -0.4083                     | -0.4281          | 0.1630           | -0.2651          |
|           | C19 - H20 | 0.0123              | 0.0436                      | -0.0070          | 0.0089           | 0.0020           |
|           | C5 - H29  | 0.0014              | 0.0044                      | -0.0005          | 0.0008           | 0.0003           |
| IM3-PT12  | O12 - C15 | 0.1821              | -0.1951                     | -0.2640          | 0.1076           | -0.1564          |
|           | C19 - H20 | 0.0080              | 0.0276                      | -0.0041          | 0.0055           | 0.0014           |
|           | C5 - H29  | 0.0049              | 0.0113                      | -0.0020          | 0.0024           | 0.0004           |

<sup>a</sup> The  $\rho_{\text{bcp}}$ ,  $\nabla^2\rho_{\text{bcp}}$ ,  $V_{\text{bcp}}$ ,  $G_{\text{bcp}}$ , and  $H_{\text{bcp}}$  is electron density, the Laplacian of the electron density, potential energy density, kinetic energy density, and energy density at the BCP, respectively. All the units are a.u.

**Table S2** Topological parameters at the BCPs for the oxidation state of the IM1-PT11 spin adduct <sup>a</sup>

| Complexes   | BCP       | $\rho_{\text{bcp}}$ | $\nabla^2\rho_{\text{bcp}}$ | $V_{\text{bcp}}$ | $G_{\text{bcp}}$ | $H_{\text{bcp}}$ |
|-------------|-----------|---------------------|-----------------------------|------------------|------------------|------------------|
| IM1-PT11-CH | C5 - C15  | 0.2818              | -0.7215                     | -0.3550          | 0.0873           | -0.2677          |
|             | O12 - C14 | 0.0146              | 0.0594                      | -0.0110          | 0.0129           | 0.0019           |
|             | H8 - O30  | 0.2907              | -1.8100                     | -0.6064          | 0.0769           | -0.5294          |
|             | H8 - O11  | 0.0855              | 0.1559                      | -0.0972          | 0.0681           | -0.0291          |
| IM1-PT11-OH | C5 - C14  | 0.2517              | -0.5830                     | -0.2767          | 0.0655           | -0.2112          |
|             | O10 - N29 | 0.0416              | 0.1318                      | -0.0275          | 0.0302           | 0.0028           |
|             | O10 - H28 | 0.0123              | 0.0498                      | -0.0083          | 0.0104           | 0.0021           |

<sup>a</sup> The  $\rho_{\text{bcp}}$ ,  $\nabla^2\rho_{\text{bcp}}$ ,  $V_{\text{bcp}}$ ,  $G_{\text{bcp}}$ , and  $H_{\text{bcp}}$  is electron density, the Laplacian of the electron density, potential energy density, kinetic energy density, and energy density at the BCP, respectively. All the units are a.u.

**Table S3** The Cartesian coordinates of the geometries including reactants, transition states, spin adducts, and the oxidated keto-enol tautomerization products

| <b>CBQ</b>     |             |             |             | <b>DMPO</b>     |             |             |             |
|----------------|-------------|-------------|-------------|-----------------|-------------|-------------|-------------|
| C              | 0.00000000  | 1.02196700  | 0.00000000  | C               | -0.67911500 | -1.34691700 | -0.35628400 |
| C              | 1.20240800  | 0.41768200  | 0.00000000  | C               | -1.94054100 | -0.51934700 | -0.00862000 |
| C              | 1.35891700  | -1.05129500 | 0.00000000  | C               | -1.42813700 | 0.88333200  | -0.02331800 |
| C              | 0.06848600  | -1.90503300 | 0.00000000  | C               | 0.51983800  | -0.44077600 | -0.01194400 |
| C              | -1.18835200 | -1.19685900 | 0.00000000  | H               | -0.67326800 | -1.57303500 | -1.42513600 |
| C              | -1.29615500 | 0.25628300  | 0.00000000  | H               | -2.34568100 | -0.78143000 | 0.97785800  |
| H              | 2.12200800  | 0.99100400  | 0.00000000  | H               | -2.74907100 | -0.67724000 | -0.72799700 |
| H              |             | -2.11105700 | -1.76651900 | H               | -2.00053200 | 1.79887400  | 0.02033100  |
|                | 0.00000000  |             |             | H               | -0.63759600 | -2.29449200 | 0.18340000  |
| Cl             | -0.14433500 | 2.74305500  | 0.00000000  | C               | 1.06173400  | -0.66334200 | 1.40423200  |
| O              | 2.44684200  | -1.57791400 | 0.00000000  | H               | 1.58723200  | -1.62040400 | 1.45412300  |
| O              | 0.13027200  | -3.12650100 | 0.00000000  | H               | 1.75973200  | 0.13341000  | 1.66739100  |
| O              | -2.38074900 | 0.81530400  | 0.00000000  | H               | 0.25528900  | -0.67526900 | 2.14249200  |
|                |             |             |             | C               | 1.63805900  | -0.46868800 | -1.04807300 |
|                |             |             |             | H               | 2.40060700  | 0.27197600  | -0.80484700 |
|                |             |             |             | H               | 2.09772900  | -1.46057700 | -1.06512600 |
|                |             |             |             | H               | 1.25253900  | -0.24910700 | -2.04672300 |
|                |             |             |             | N               | -0.12544800 | 0.94908700  | -0.02720700 |
|                |             |             |             | O               | 0.61251700  | 1.97726300  | 0.00984000  |
| <b>IM1(C5)</b> |             |             |             | <b>IM2(O11)</b> |             |             |             |
| C              | 2.29707600  | -0.14577800 | -0.23299400 | C               | -3.40820400 | 0.00652600  | 0.12728600  |
| C              | 1.92712700  | 0.78739100  | -1.13145700 | C               | -2.98255900 | 1.25612500  | 0.35156300  |
| C              | 0.83146300  | 1.73400800  | -0.89168800 | C               | -1.56477400 | 1.62971700  | 0.17899900  |
| C              | 0.26564100  | 1.78410900  | 0.54548300  | C               | -0.61344100 | 0.53901800  | -0.25254400 |
| C              | 0.39694000  | 0.53052400  | 1.39281700  | C               | -1.04762700 | -0.72391200 | -0.44848100 |
| C              | 1.63877700  | -0.31524200 | 1.10459800  | C               | -2.46162400 | -1.08907900 | -0.30361300 |
| H              | 2.42437800  | 0.86758000  | -2.09098100 | H               | -3.64696600 | 2.05208700  | 0.66360000  |
| H              | 0.46993700  | 0.83941500  | 2.43878800  | H               | -0.37814000 | -1.53990500 | -0.68833200 |
| Cl             | 3.59843400  | -1.23173200 | -0.56950500 | Cl              | -5.07113400 | -0.43936800 | 0.31632300  |
| O              | 0.40055000  | 2.47266700  | -1.75112100 | O               | -1.18175200 | 2.76533100  | 0.37652200  |
| O              | -0.25106300 | 2.79025700  | 0.96292100  | O               | 0.63679700  | 1.00353400  | -0.39471000 |
| O              | 2.07041300  | -1.07018000 | 1.94196900  | O               | -2.86122000 | -2.21728000 | -0.51430200 |
| C              | -2.95827800 | 0.50101700  | 0.31145800  | C               | 3.64996600  | 1.17196300  | -0.07683500 |
| C              | -2.21443800 | 0.32943300  | 1.65567400  | C               | 2.80905200  | 1.15043200  | -1.36961800 |
| C              | -0.88591600 | -0.36647000 | 1.30527900  | C               | 1.66250600  | 0.20773800  | -1.03616000 |
| C              | -2.49796500 | -0.67184500 | -0.57342400 | C               | 3.56744500  | -0.26512200 | 0.48492500  |
| H              | -2.67703200 | 1.44753400  | -0.15628200 | H               | 3.21293300  | 1.87809600  | 0.63257300  |
| H              | -2.78200000 | -0.30974500 | 2.33486400  | H               | 3.37736700  | 0.73050800  | -2.20342000 |
| H              | -2.06058100 | 1.28574000  | 2.15509900  | H               | 2.44169000  | 2.13338100  | -1.66243300 |
| H              | -0.68324700 | -1.22333300 | 1.95497500  | H               | 1.21904200  | -0.32816400 | -1.87711800 |
| H              | -4.04146100 | 0.50785300  | 0.44257800  | H               | 4.68214300  | 1.47454900  | -0.25884700 |
| C              | -3.29868000 | -1.96059100 | -0.31541700 | C               | 4.70264900  | -1.16747100 | -0.02227600 |
| H              | -4.31662800 | -1.84885600 | -0.69710200 | H               | 5.64718100  | -0.87316500 | 0.44181000  |

|                 |             |             |             |                 |             |             |             |
|-----------------|-------------|-------------|-------------|-----------------|-------------|-------------|-------------|
| H               | -2.82686800 | -2.80318300 | -0.82489300 | H               | 4.49717000  | -2.20827400 | 0.23460000  |
| H               | -3.35851900 | -2.19543900 | 0.75058800  | H               | 4.81645200  | -1.09868000 | -1.10730300 |
| C               | -2.45803200 | -0.34574500 | -2.06587900 | C               | 3.46696400  | -0.32087600 | 2.01145300  |
| H               | -2.00438000 | -1.16822000 | -2.62216900 | H               | 3.30287100  | -1.34801900 | 2.34353900  |
| H               | -3.47411400 | -0.19444000 | -2.43888200 | H               | 4.39415600  | 0.04470900  | 2.46061900  |
| H               | -1.88320100 | 0.56260500  | -2.25820800 | H               | 2.64116700  | 0.29690100  | 2.37132300  |
| N               | -1.10153000 | -0.86531900 | -0.06488600 | N               | 2.27743300  | -0.74096200 | -0.11752600 |
| O               | -0.28380600 | -1.68470600 | -0.58868000 | O               | 1.82843300  | -1.91763500 | 0.06078700  |
| <b>IM3(O12)</b> |             |             |             | <b>IM4(O10)</b> |             |             |             |
| C               | 1.87538200  | 1.11808000  | 0.03387900  | C               | 3.08321000  | -0.67724900 | -0.07878000 |
| C               | 3.07980600  | 0.70589200  | 0.46219500  | C               | 1.75284900  | -0.92765200 | -0.15338500 |
| C               | 3.49677900  | -0.69769600 | 0.30398300  | C               | 0.84345700  | 0.16428500  | -0.03784800 |
| C               | 2.50460800  | -1.65267200 | -0.42683600 | C               | 1.30262900  | 1.59906500  | 0.09035800  |
| C               | 1.21324800  | -1.08996100 | -0.82029500 | C               | 2.68820700  | 1.77817300  | 0.18783100  |
| C               | 0.88746000  | 0.19780900  | -0.58336500 | C               | 3.64463900  | 0.73073400  | 0.11082200  |
| H               | 3.79480400  | 1.38802200  | 0.90371000  | H               | 1.35145700  | -1.92645300 | -0.26631100 |
| H               | 0.49926500  | -1.75289900 | -1.29133000 | H               | 3.06725300  | 2.78656300  | 0.29330900  |
| Cl              | 1.45597100  | 2.81135500  | 0.13141700  | Cl              | 4.21220200  | -1.96035000 | -0.18296700 |
| O               | 4.56852800  | -1.10160100 | 0.69575700  | O               | -0.40208900 | -0.17600300 | -0.08382000 |
| O               | 2.81299500  | -2.80770300 | -0.62956900 | O               | 0.42093600  | 2.48779600  | 0.08087700  |
| O               | -0.30756800 | 0.68556100  | -1.00503900 | O               | 4.86735900  | 0.86691100  | 0.17531800  |
| C               | -3.35241500 | 0.24479800  | -1.09128600 | C               | -3.17131000 | 0.17725500  | -1.48536100 |
| C               | -2.54865400 | 1.52347800  | -0.77226600 | C               | -2.20614700 | 1.28099600  | -1.00544200 |
| C               | -1.33600200 | 1.01208900  | -0.01350700 | C               | -1.59259000 | 0.71363900  | 0.25878600  |
| C               | -3.13889200 | -0.68675500 | 0.12215400  | C               | -3.69331600 | -0.50284300 | -0.20011600 |
| H               | -2.95513700 | -0.22378500 | -1.99437800 | H               | -2.63232900 | -0.55030300 | -2.09738200 |
| H               | -3.11506000 | 2.19347000  | -0.12066100 | H               | -2.74010900 | 2.19411700  | -0.73022000 |
| H               | -2.25313600 | 2.08100000  | -1.66038200 | H               | -1.44879200 | 1.56173300  | -1.73422700 |
| H               | -0.91156000 | 1.68590200  | 0.72821500  | H               | -1.24746700 | 1.41817900  | 1.00405500  |
| H               | -4.41019200 | 0.45212400  | -1.25961500 | H               | -3.98653400 | 0.57773300  | -2.08934300 |
| C               | -4.19933800 | -0.48971100 | 1.21726500  | C               | -4.98654600 | 0.13581900  | 0.32914200  |
| H               | -5.15962900 | -0.89184000 | 0.88496800  | H               | -5.82324100 | -0.11765400 | -0.32647000 |
| H               | -3.89902400 | -1.01322800 | 2.12702400  | H               | -5.20519600 | -0.23715300 | 1.33169500  |
| H               | -4.33462900 | 0.56757200  | 1.45970700  | H               | -4.90588400 | 1.22477500  | 0.37817000  |
| C               | -3.01430600 | -2.16520800 | -0.25200200 | C               | -3.84477500 | -2.02020900 | -0.32569600 |
| H               | -2.74676400 | -2.75865500 | 0.62434300  | H               | -4.11317100 | -2.45688100 | 0.63803200  |
| H               | -3.96650700 | -2.53289700 | -0.64300700 | H               | -4.63201800 | -2.25677800 | -1.04603600 |
| H               | -2.24887400 | -2.31383500 | -1.01699600 | H               | -2.91405700 | -2.48009300 | -0.66579700 |
| N               | -1.82446300 | -0.18333800 | 0.64276800  | N               | -2.58334200 | -0.18945700 | 0.76384700  |
| O               | -1.20893800 | -0.71519100 | 1.61952800  | O               | -2.53818000 | -0.65341900 | 1.94414300  |
| <b>IM5(C2)</b>  |             |             |             | <b>IM6(C1)</b>  |             |             |             |
| C               | 1.97312500  | -0.66800700 | -0.21034100 | C               | 0.59348900  | -0.41113200 | 0.59510000  |
| C               | 0.62327200  | -0.39576100 | -0.68713600 | C               | 1.73621800  | -1.27080200 | 0.19090100  |
| C               | 0.40803600  | 1.08377400  | -1.00620500 | C               | 2.88648200  | -0.77732600 | -0.51317700 |
| C               | 1.18448400  | 2.11138100  | -0.16403700 | C               | 3.06069400  | 0.74480700  | -0.61237100 |
| C               | 2.38434400  | 1.64906800  | 0.46080700  | C               | 2.20000900  | 1.53493000  | 0.23459800  |

|                    |             |             |             |                    |             |             |             |
|--------------------|-------------|-------------|-------------|--------------------|-------------|-------------|-------------|
| C                  | 2.86014500  | 0.28209400  | 0.46873000  | C                  | 1.12723400  | 0.99895700  | 1.04146400  |
| H                  | 0.38273500  | -0.98831400 | -1.57603700 | H                  | 1.67448500  | -2.34146300 | 0.34702800  |
| H                  | 3.01205500  | 2.38758300  | 0.94819400  | H                  | 2.39794700  | 2.59771700  | 0.31859400  |
| Cl                 | 2.53510500  | -2.27336200 | -0.34837600 | Cl                 | -0.27067400 | -1.20049100 | 1.98857900  |
| O                  | -0.35836600 | 1.41774400  | -1.87161300 | O                  | 3.70979800  | -1.54637800 | -1.00912500 |
| O                  | 0.75529700  | 3.25974700  | -0.07740500 | O                  | 3.93178500  | 1.23335500  | -1.31987500 |
| O                  | 3.92265900  | -0.06982500 | 0.98774300  | O                  | 0.64872400  | 1.58859500  | 1.98945700  |
| C                  | -1.96314600 | 0.78149300  | 1.29800800  | C                  | -2.54200300 | -1.40848300 | -0.64617600 |
| C                  | -0.73813200 | -0.09706200 | 1.63847600  | C                  | -1.08212900 | -1.49837700 | -1.14489900 |
| C                  | -0.50259100 | -0.93968600 | 0.38432300  | C                  | -0.38639000 | -0.22966000 | -0.62071200 |
| C                  | -2.83081700 | -0.06693700 | 0.34674300  | C                  | -2.86812400 | 0.09273100  | -0.54640200 |
| H                  | -1.65119700 | 1.70152500  | 0.79921000  | H                  | -2.62825200 | -1.87166700 | 0.33737300  |
| H                  | -0.95699700 | -0.76387300 | 2.47584400  | H                  | -1.04400600 | -1.49603100 | -2.23612100 |
| H                  | 0.13409200  | 0.49226300  | 1.92451500  | H                  | -0.59628000 | -2.41157600 | -0.80348300 |
| H                  | -0.18074100 | -1.96403200 | 0.57880600  | H                  | 0.22203500  | 0.26095700  | -1.39172900 |
| H                  | -2.51567900 | 1.06893200  | 2.19344300  | H                  | -3.22988800 | -1.92076300 | -1.32051800 |
| C                  | -3.82751500 | -0.96410200 | 1.10176400  | C                  | -3.42672900 | 0.66782000  | -1.85970700 |
| H                  | -4.61701500 | -0.34619500 | 1.53596000  | H                  | -4.43997900 | 0.29310100  | -2.02287300 |
| H                  | -4.28466500 | -1.68008900 | 0.41602900  | H                  | -3.46228900 | 1.75767300  | -1.80850200 |
| H                  | -3.34308400 | -1.51970400 | 1.90895500  | H                  | -2.81404900 | 0.38233400  | -2.71899500 |
| C                  | -3.53550900 | 0.73619100  | -0.74626000 | C                  | -3.76420900 | 0.45424100  | 0.63938900  |
| H                  | -4.06091900 | 0.06839900  | -1.43129800 | H                  | -3.88658600 | 1.53640300  | 0.71014600  |
| H                  | -4.26646200 | 1.40548800  | -0.28576400 | H                  | -4.74919300 | -0.00012100 | 0.50642200  |
| H                  | -2.82545400 | 1.33389100  | -1.31892900 | H                  | -3.33484800 | 0.09249900  | 1.57562900  |
| N                  | -1.79176600 | -0.97325900 | -0.26433600 | N                  | -1.50324000 | 0.67939000  | -0.32629700 |
| O                  | -2.01899900 | -1.70898700 | -1.25190200 | O                  | -1.31433400 | 1.89784200  | -0.10580600 |
| <b>IM2(O11)-TS</b> |             |             |             | <b>IM3(O12)-TS</b> |             |             |             |
| C                  | 3.10644200  | -0.34241100 | -0.02628900 | C                  | 1.90700400  | 1.14044200  | -0.01259600 |
| C                  | 2.28495500  | -1.15968600 | -0.70104600 | C                  | 3.05955600  | 0.64147200  | 0.45889800  |
| C                  | 0.94423200  | -0.71979600 | -1.13373000 | C                  | 3.38743300  | -0.78865200 | 0.30695200  |
| C                  | 0.55020000  | 0.73694700  | -0.88426400 | C                  | 2.35794600  | -1.67838200 | -0.44543400 |
| C                  | 1.43246600  | 1.53426500  | -0.16382200 | C                  | 1.14289300  | -1.03589300 | -0.89995400 |
| C                  | 2.73151900  | 1.08266400  | 0.30680500  | C                  | 0.87505900  | 0.31529600  | -0.72219600 |
| H                  | 2.55508500  | -2.18157300 | -0.93787000 | H                  | 3.79286300  | 1.26094300  | 0.95980500  |
| H                  | 1.17417200  | 2.56150500  | 0.06441900  | H                  | 0.41849600  | -1.64819900 | -1.42113900 |
| Cl                 | 4.66646500  | -0.86991200 | 0.51295800  | Cl                 | 1.55359600  | 2.84298000  | 0.16127900  |
| O                  | 0.17270400  | -1.49324300 | -1.66926800 | O                  | 4.41619300  | -1.25808500 | 0.74028400  |
| O                  | -0.56260600 | 1.14066100  | -1.34875200 | O                  | 2.59341500  | -2.86275500 | -0.61724400 |
| O                  | 3.49417900  | 1.80896700  | 0.92463900  | O                  | -0.19644800 | 0.86826600  | -1.16028100 |
| C                  | -3.60125400 | -0.18446300 | -0.92244800 | C                  | -3.41450400 | 0.20576600  | -1.01944900 |
| C                  | -3.30053200 | 1.33259500  | -0.93939800 | C                  | -2.76830900 | 1.56517200  | -0.66321300 |
| C                  | -2.17040200 | 1.45796500  | 0.01800900  | C                  | -1.62907300 | 1.18075100  | 0.21517600  |
| C                  | -3.11070600 | -0.68769400 | 0.45208300  | C                  | -3.03316100 | -0.75382100 | 0.13084700  |
| H                  | -3.02882400 | -0.67093400 | -1.71312400 | H                  | -2.99426000 | -0.15855800 | -1.95796200 |
| H                  | -4.14946600 | 1.93500200  | -0.59165300 | H                  | -3.45056600 | 2.22017500  | -0.10806500 |
| H                  | -3.01810200 | 1.70054700  | -1.92645100 | H                  | -2.41948200 | 2.11690400  | -1.53639200 |

|                    |             |             |             |                   |             |             |             |
|--------------------|-------------|-------------|-------------|-------------------|-------------|-------------|-------------|
| H                  | -1.66435600 | 2.36066300  | 0.31922900  | H                 | -0.99403000 | 1.85968300  | 0.76223400  |
| H                  | -4.65896300 | -0.40254900 | -1.07480800 | H                 | -4.49618200 | 0.27806100  | -1.13803600 |
| C                  | -4.19209700 | -0.61398200 | 1.54042700  | C                 | -4.08240300 | -0.79480400 | 1.25101800  |
| H                  | -4.94804200 | -1.38026600 | 1.35428700  | H                 | -4.97683400 | -1.31222200 | 0.89651000  |
| H                  | -3.75396600 | -0.79294300 | 2.52446800  | H                 | -3.69182900 | -1.33220500 | 2.11758600  |
| H                  | -4.68872900 | 0.35994900  | 1.55438500  | H                 | -4.37133200 | 0.21056100  | 1.56864300  |
| C                  | -2.44616800 | -2.05861800 | 0.42040600  | C                 | -2.65739600 | -2.15980800 | -0.32587900 |
| H                  | -2.01509200 | -2.29889100 | 1.39394900  | H                 | -2.26448400 | -2.74448000 | 0.50716500  |
| H                  | -3.19963000 | -2.81360300 | 0.18124500  | H                 | -3.54590300 | -2.66238400 | -0.71570300 |
| H                  | -1.66296200 | -2.09877700 | -0.33682100 | H                 | -1.90615800 | -2.13184900 | -1.11647100 |
| N                  | -2.08109900 | 0.38536700  | 0.79654000  | N                 | -1.81106800 | -0.05171000 | 0.70115600  |
| O                  | -1.23868400 | 0.23687600  | 1.72991600  | O                 | -1.02618500 | -0.61622100 | 1.52311300  |
| <b>IM4(O10)-TS</b> |             |             |             | <b>IM5(C2)-TS</b> |             |             |             |
| C                  | -3.17590900 | 0.66771100  | -0.03939300 | C                 | 2.00701500  | -0.64592800 | -0.26025400 |
| C                  | -1.87120100 | 0.99645200  | -0.03478300 | C                 | 0.73595200  | -0.36991100 | -0.79714400 |
| C                  | -0.87409300 | -0.05616700 | 0.03314800  | C                 | 0.43641700  | 1.08222400  | -1.05136600 |
| C                  | -1.29374400 | -1.53906200 | 0.11959200  | C                 | 1.15876700  | 2.11683400  | -0.16825000 |
| C                  | -2.66198800 | -1.78693200 | 0.09955400  | C                 | 2.34217400  | 1.67194400  | 0.49749300  |
| C                  | -3.66986600 | -0.78233400 | 0.02288300  | C                 | 2.84439100  | 0.31431300  | 0.48847100  |
| H                  | -1.52281700 | 2.02041000  | -0.07914800 | H                 | 0.38796800  | -1.02243200 | -1.59674600 |
| H                  | -3.00032900 | -2.81446500 | 0.14386900  | H                 | 2.92159100  | 2.40591000  | 1.04686800  |
| Cl                 | -4.38376900 | 1.89387200  | -0.11957800 | Cl                | 2.59411600  | -2.25844000 | -0.35576000 |
| O                  | 0.32338900  | 0.28631500  | 0.01249100  | O                 | -0.35231100 | 1.41128400  | -1.90377700 |
| O                  | -0.36231500 | -2.37239000 | 0.18508100  | O                 | 0.69330400  | 3.25108100  | -0.07586900 |
| O                  | -4.88056200 | -0.98459300 | 0.00304900  | O                 | 3.88226000  | -0.02926600 | 1.05319600  |
| C                  | 3.12297700  | -0.04187600 | -1.54489000 | C                 | -1.95794600 | 0.78420000  | 1.29357500  |
| C                  | 2.31283800  | -1.27574500 | -1.08982300 | C                 | -0.76671600 | -0.12727900 | 1.67104100  |
| C                  | 1.91498600  | -0.94482800 | 0.30328500  | C                 | -0.59624400 | -1.01904200 | 0.46552400  |
| C                  | 3.70033200  | 0.57748200  | -0.25072000 | C                 | -2.82663300 | -0.05057500 | 0.33047400  |
| H                  | 2.45778300  | 0.67258700  | -2.03261800 | H                 | -1.60508900 | 1.68779700  | 0.79358200  |
| H                  | 2.92911300  | -2.18377500 | -1.04671300 | H                 | -0.99151300 | -0.74568800 | 2.54607100  |
| H                  | 1.45208000  | -1.51488900 | -1.71031700 | H                 | 0.13808700  | 0.43534700  | 1.91198700  |
| H                  | 1.38017100  | -1.60411100 | 0.96974000  | H                 | -0.14165100 | -2.00040400 | 0.55314000  |
| H                  | 3.91304000  | -0.30106700 | -2.24992000 | H                 | -2.52504100 | 1.09654600  | 2.17099900  |
| C                  | 5.11609600  | 0.08335300  | 0.07372100  | C                 | -3.87782400 | -0.89618800 | 1.06920600  |
| H                  | 5.82470600  | 0.51596000  | -0.63600700 | H                 | -4.65461800 | -0.23769300 | 1.46414500  |
| H                  | 5.40545800  | 0.38930200  | 1.08110500  | H                 | -4.34098800 | -1.60849900 | 0.38396100  |
| H                  | 5.18768700  | -1.00545600 | 0.00813500  | H                 | -3.44095900 | -1.45017100 | 1.90422700  |
| C                  | 3.60950300  | 2.10132700  | -0.19685800 | C                 | -3.45752700 | 0.73922700  | -0.81300700 |
| H                  | 3.94465800  | 2.47479900  | 0.77236100  | H                 | -3.98236500 | 0.06910600  | -1.49620100 |
| H                  | 4.24845200  | 2.52915900  | -0.97313600 | H                 | -4.18068700 | 1.44633900  | -0.39907300 |
| H                  | 2.58471800  | 2.43758200  | -0.36552700 | H                 | -2.70783200 | 1.29617700  | -1.37513600 |
| N                  | 2.76435900  | -0.01023300 | 0.79359800  | N                 | -1.80095000 | -1.03533100 | -0.21062100 |
| O                  | 2.79314700  | 0.35360400  | 2.00206900  | O                 | -2.05090100 | -1.79940500 | -1.16606400 |
| <b>IM6(C1)-TS</b>  |             |             |             | <b>IM1-PT11</b>   |             |             |             |
| C                  | -0.76150300 | 1.11999000  | 0.03625600  | C                 | -2.90630100 | -0.31499100 | -0.05198500 |

|                 |             |             |             |                 |             |             |             |
|-----------------|-------------|-------------|-------------|-----------------|-------------|-------------|-------------|
| C               | -1.92211000 | 0.92476900  | -0.78093400 | C               | -3.09068600 | 0.98298000  | -0.30857200 |
| C               | -2.74500900 | -0.25880500 | -0.75020300 | C               | -1.96065900 | 1.92447200  | -0.23136400 |
| C               | -2.47704600 | -1.26945500 | 0.38180000  | C               | -0.59528700 | 1.38196600  | 0.15328000  |
| C               | -1.42409700 | -0.93228700 | 1.32255300  | C               | -0.38846400 | 0.03653700  | 0.27901400  |
| C               | -0.61958200 | 0.25107500  | 1.27723400  | C               | -1.55038500 | -0.87281600 | 0.29927900  |
| H               | -2.17337900 | 1.66981600  | -1.52778900 | H               | -4.05257700 | 1.40305900  | -0.57348000 |
| H               | -1.27082400 | -1.59950000 | 2.16344600  | H               | 1.08687300  | 2.04355200  | 0.79164600  |
| Cl              | -0.45277000 | 2.85283300  | 0.38160100  | Cl              | -4.21126400 | -1.45406100 | -0.10615300 |
| O               | -3.65063300 | -0.44002900 | -1.55354400 | O               | -2.10952900 | 3.10444300  | -0.46949900 |
| O               | -3.13852500 | -2.28738600 | 0.47923600  | O               | 0.28253700  | 2.36006600  | 0.30863700  |
| O               | 0.22638600  | 0.51574500  | 2.13065500  | O               | -1.43396200 | -2.04969400 | 0.59891600  |
| C               | 2.87343100  | 0.67224900  | 0.08870500  | C               | 2.45179800  | -1.20154900 | -1.32824000 |
| C               | 2.01839800  | 1.41605300  | -0.95811100 | C               | 1.28007500  | -1.78413500 | -0.51606700 |
| C               | 0.75384800  | 0.58775900  | -1.06608300 | C               | 0.92535400  | -0.70244400 | 0.54112700  |
| C               | 2.50724100  | -0.81334200 | -0.07277500 | C               | 3.24307200  | -0.32975100 | -0.34068400 |
| H               | 2.60411400  | 1.00823700  | 1.09090600  | H               | 2.07363100  | -0.57493700 | -2.14112400 |
| H               | 2.50509400  | 1.44026600  | -1.93898700 | H               | 1.57531300  | -2.70052400 | -0.00324500 |
| H               | 1.81453900  | 2.44626900  | -0.67486700 | H               | 0.43055700  | -2.03449300 | -1.14605900 |
| H               | 0.21909200  | 0.58335200  | -2.00779700 | H               | 0.85056100  | -1.15792700 | 1.53435600  |
| H               | 3.94121000  | 0.83772700  | -0.06009500 | H               | 3.07382700  | -1.98053600 | -1.77242300 |
| C               | 3.33035900  | -1.50768300 | -1.17480600 | C               | 4.24065800  | -1.13913500 | 0.50773600  |
| H               | 4.36104500  | -1.61919200 | -0.83103900 | H               | 5.07369400  | -1.47055400 | -0.11719700 |
| H               | 2.92584500  | -2.49964600 | -1.38561400 | H               | 4.63721500  | -0.51797700 | 1.31344100  |
| H               | 3.34048900  | -0.93180100 | -2.10344200 | H               | 3.77464800  | -2.02211600 | 0.95177000  |
| C               | 2.52166900  | -1.62746400 | 1.21636200  | C               | 3.93003700  | 0.87269100  | -0.98885200 |
| H               | 2.12990400  | -2.63178900 | 1.04515000  | H               | 4.39828700  | 1.50404400  | -0.23222800 |
| H               | 3.55481800  | -1.71764400 | 1.56070800  | H               | 4.70272900  | 0.52453300  | -1.67877200 |
| H               | 1.93515000  | -1.14101800 | 1.99564700  | H               | 3.21458500  | 1.47838300  | -1.54979500 |
| N               | 1.09549600  | -0.69825000 | -0.62793100 | N               | 2.13639100  | 0.14589500  | 0.54170600  |
| O               | 0.28876400  | -1.64241000 | -0.62358500 | O               | 2.30122200  | 1.09522400  | 1.38041300  |
| <b>IM1-PT12</b> |             |             |             | <b>IM2-PT11</b> |             |             |             |
| C               | -2.69416700 | -0.50330800 | 0.04699200  | C               | -3.66240500 | 0.17386200  | 0.11661000  |
| C               | -3.17373200 | 0.72500200  | 0.29234800  | C               | -2.90835700 | 1.28421700  | 0.11265300  |
| C               | -2.27544700 | 1.88425900  | 0.24433300  | C               | -1.42401500 | 1.21192000  | 0.06944800  |
| C               | -0.76353800 | 1.62575700  | -0.05313000 | C               | -0.95830100 | -0.17777900 | 0.06443700  |
| C               | -0.36629200 | 0.27238200  | -0.43170800 | C               | -1.59446800 | -1.30435600 | 0.16299300  |
| C               | -1.26443700 | -0.75608600 | -0.26786300 | C               | -3.04014200 | -1.20269600 | -0.11558700 |
| H               | -4.21612300 | 0.90325900  | 0.52238400  | H               | -3.33406900 | 2.27894400  | 0.15272600  |
| H               | 0.02705000  | -2.18369000 | -0.21386900 | H               | 0.60417700  | -1.17568200 | 0.85837300  |
| Cl              | -3.74402000 | -1.88651700 | 0.09316000  | Cl              | -5.39624300 | 0.25490500  | 0.18609500  |
| O               | -2.66954900 | 3.01532700  | 0.42121100  | O               | -0.72565400 | 2.21200200  | 0.11167700  |
| O               | 0.00345700  | 2.56539900  | 0.05583700  | O               | 0.62042200  | -0.27149100 | 0.47456100  |
| O               | -0.95255600 | -2.03744700 | -0.38731800 | O               | -3.70600600 | -2.08618700 | -0.60937000 |
| C               | 2.92914800  | 1.24606200  | -0.20853000 | C               | 3.20361700  | 1.45568200  | -0.16055700 |
| C               | 1.97613300  | 1.06747800  | -1.40577900 | C               | 2.02836700  | 1.07792500  | -1.08691800 |
| C               | 1.01898100  | -0.06495600 | -0.98651600 | C               | 1.64764300  | -0.31855000 | -0.64886000 |



|                 |             |             |             |                 |             |             |             |
|-----------------|-------------|-------------|-------------|-----------------|-------------|-------------|-------------|
| C               | 3.13337500  | -0.16707300 | 0.37737300  | C               | 3.94736100  | 0.13531200  | 0.13667400  |
| H               | 2.45833100  | 1.89644300  | 0.53083000  | H               | 2.81478000  | 1.88231400  | 0.76656900  |
| H               | 2.52921700  | 0.73189900  | -2.28707800 | H               | 2.34122000  | 1.02694800  | -2.13336400 |
| H               | 1.46200700  | 1.99030600  | -1.65597900 | H               | 1.19105700  | 1.76890400  | -1.00708200 |
| H               | 0.85320600  | -0.74876200 | -1.82699200 | H               | 1.21134000  | -0.98397300 | -1.39294600 |
| H               | 3.87912800  | 1.69630500  | -0.50177700 | H               | 3.86136800  | 2.19549800  | -0.61810200 |
| C               | 4.28907700  | -0.93014100 | -0.29294600 | C               | 5.06675900  | -0.16263300 | -0.87263800 |
| H               | 5.24302300  | -0.48897400 | 0.00591500  | H               | 5.90087800  | 0.52565500  | -0.71609200 |
| H               | 4.27865400  | -1.97799300 | 0.01307300  | H               | 5.43131400  | -1.18367600 | -0.74166300 |
| H               | 4.21882800  | -0.88880600 | -1.38272100 | H               | 4.71950300  | -0.05140500 | -1.90303200 |
| C               | 3.27719100  | -0.18831500 | 1.90157200  | C               | 4.45973300  | 0.02889000  | 1.57350400  |
| H               | 3.31481600  | -1.21551300 | 2.26958000  | H               | 4.87885200  | -0.96129800 | 1.76010100  |
| H               | 4.20077700  | 0.31874800  | 2.19192500  | H               | 5.24071500  | 0.77457500  | 1.74105800  |
| H               | 2.43901000  | 0.32355500  | 2.37940100  | H               | 3.65512800  | 0.20539300  | 2.29088300  |
| N               | 1.84673300  | -0.81509100 | -0.00912200 | N               | 2.84363300  | -0.86507100 | -0.07625300 |
| O               | 1.55809100  | -2.02411900 | 0.30259100  | O               | 2.90119800  | -2.07818100 | 0.29840400  |
| <b>IM2-PT12</b> |             |             |             | <b>IM3-PT11</b> |             |             |             |
| C               | -3.18525500 | 0.04505800  | 0.32686900  | C               | 1.70941800  | 1.20696800  | 0.03925600  |
| C               | -2.68681400 | 1.27982400  | 0.49179900  | C               | 2.62066400  | 0.61792400  | 0.82856100  |
| C               | -1.40808600 | 1.67544100  | -0.16339500 | C               | 2.96612700  | -0.82868300 | 0.65886400  |
| C               | -0.62101700 | 0.50179700  | -0.74453900 | C               | 2.45534500  | -1.41705800 | -0.64370900 |
| C               | -1.22655800 | -0.67310000 | -1.02506700 | C               | 1.42716400  | -0.82773000 | -1.27083000 |
| C               | -2.51868600 | -0.84529800 | -0.65311400 | C               | 0.89956300  | 0.34303400  | -0.85723200 |
| H               | -3.18668500 | 2.03927300  | 1.07776900  | H               | 3.16285600  | 1.15260200  | 1.59705000  |
| H               | -2.82199300 | -2.19060400 | -1.91147800 | H               | 2.91163800  | -2.62474500 | -2.01222200 |
| Cl              | -4.69077700 | -0.44729800 | 1.05732100  | Cl              | 1.38783500  | 2.93340500  | 0.15846300  |
| O               | -0.98227500 | 2.80698600  | -0.09911700 | O               | 3.75005200  | -1.38693700 | 1.39268700  |
| O               | 0.68455900  | 0.77734300  | -0.81215600 | O               | 3.23897200  | -2.39598600 | -1.13056300 |
| O               | -3.34457600 | -1.71915300 | -1.24416100 | O               | -0.37653400 | 0.67062800  | -1.17203800 |
| C               | 3.73542000  | 0.76421600  | -0.62140000 | C               | -3.33708800 | 0.02200400  | -1.04428400 |
| C               | 2.83593300  | 0.20760900  | -1.74435300 | C               | -2.64616000 | 1.39014400  | -0.85702100 |
| C               | 1.61518600  | -0.32154300 | -1.01074500 | C               | -1.34971700 | 1.04704700  | -0.14613100 |
| C               | 3.50833300  | -0.17011500 | 0.58765000  | C               | -2.95052300 | -0.81381600 | 0.19854800  |
| H               | 3.42032900  | 1.77924700  | -0.36945600 | H               | -2.95606800 | -0.45953000 | -1.94697400 |
| H               | 3.31977500  | -0.62372100 | -2.26423000 | H               | -3.23586000 | 2.04877600  | -0.21420700 |
| H               | 2.56074400  | 0.95769700  | -2.48544500 | H               | -2.45744100 | 1.90946100  | -1.79610200 |
| H               | 1.06830100  | -1.14288100 | -1.47430900 | H               | -0.93092500 | 1.81933800  | 0.49389800  |
| H               | 4.78661700  | 0.80171100  | -0.91187900 | H               | -4.41935700 | 0.11697200  | -1.14506300 |
| C               | 4.51475500  | -1.33004400 | 0.64188300  | C               | -3.98581000 | -0.71275700 | 1.32917600  |
| H               | 5.50457800  | -0.95668600 | 0.91715900  | H               | -4.89520600 | -1.25276800 | 1.05342400  |
| H               | 4.19987300  | -2.06279200 | 1.38777000  | H               | -3.58549100 | -1.15264900 | 2.24499000  |
| H               | 4.59457600  | -1.83691100 | -0.32347100 | H               | -4.25260500 | 0.32716400  | 1.53604800  |
| C               | 3.45793700  | 0.57033400  | 1.92637400  | C               | -2.63279300 | -2.27563700 | -0.12567800 |
| H               | 3.19468900  | -0.11795700 | 2.73164300  | H               | -2.27690900 | -2.79482900 | 0.76607900  |
| H               | 4.43544500  | 1.00767700  | 2.14661000  | H               | -3.53348800 | -2.77965900 | -0.48622200 |
| H               | 2.71653600  | 1.37192000  | 1.90055800  | H               | -1.86121200 | -2.34406500 | -0.89537300 |

|                    |             |             |             |                    |             |             |             |
|--------------------|-------------|-------------|-------------|--------------------|-------------|-------------|-------------|
| N                  | 2.15325000  | -0.73647200 | 0.27567500  | N                  | -1.69978800 | -0.11406000 | 0.64564400  |
| O                  | 1.48614100  | -1.42663600 | 1.10578400  | O                  | -0.91520900 | -0.58072600 | 1.52668700  |
| <b>IM3-PT12</b>    |             |             |             | <b>IM1-PT11-1W</b> |             |             |             |
| C                  | 1.79854300  | 1.12898100  | 0.07326300  | C                  | 2.95719200  | -0.54609900 | -0.07373600 |
| C                  | 2.83755100  | 0.57530800  | 0.72369000  | C                  | 3.04712400  | 0.78498900  | -0.17972700 |
| C                  | 3.12802500  | -0.86968500 | 0.54140400  | C                  | 1.84859600  | 1.61980000  | -0.05172900 |
| C                  | 2.44691900  | -1.54410500 | -0.71016700 | C                  | 0.52833100  | 0.94853300  | 0.19672300  |
| C                  | 1.15660900  | -0.97359700 | -1.13676300 | C                  | 0.42819400  | -0.40463600 | 0.27995000  |
| C                  | 1.00185900  | 0.26614900  | -0.77278800 | C                  | 1.63543100  | -1.24298600 | 0.17986600  |
| H                  | 3.47101500  | 1.13782000  | 1.39614500  | H                  | 3.98155100  | 1.30120000  | -0.35899300 |
| H                  | -0.57595200 | 0.12832900  | -1.87763000 | H                  | 0.60322900  | 4.46091800  | -0.12131500 |
| Cl                 | 1.42663900  | 2.84217900  | 0.23240300  | Cl                 | 4.34702300  | -1.56320400 | -0.21121900 |
| O                  | 3.89150600  | -1.47475600 | 1.25789200  | O                  | 1.91753900  | 2.83910000  | -0.14554500 |
| O                  | 3.06121900  | -2.40715200 | -1.29586200 | O                  | -0.54421900 | 1.72202400  | 0.32614200  |
| O                  | -0.37405700 | 0.88717400  | -1.28419300 | O                  | 1.60711300  | -2.45272000 | 0.30284800  |
| C                  | -3.25425100 | -0.40315200 | -1.08612200 | C                  | -2.99230600 | -0.13222800 | 1.30715600  |
| C                  | -2.84913800 | 1.08661300  | -1.15926000 | C                  | -1.68814800 | -0.83557700 | 1.75157300  |
| C                  | -1.58261500 | 1.15120100  | -0.33003600 | C                  | -0.88993700 | -1.12540500 | 0.45466200  |
| C                  | -2.82013100 | -0.87699500 | 0.32044900  | C                  | -3.24131400 | -0.57248000 | -0.14521200 |
| H                  | -2.73043200 | -0.98184200 | -1.85288300 | H                  | -2.85610900 | 0.94928100  | 1.33853300  |
| H                  | -3.59776100 | 1.72374100  | -0.68088400 | H                  | -1.90357500 | -1.77952000 | 2.25597900  |
| H                  | -2.70431400 | 1.45973600  | -2.17382000 | H                  | -1.12175300 | -0.21790300 | 2.44847200  |
| H                  | -1.29301000 | 2.09438700  | 0.11969400  | H                  | -0.66927100 | -2.19184500 | 0.37155200  |
| H                  | -4.32284500 | -0.54331600 | -1.25029600 | H                  | -3.83345400 | -0.38808100 | 1.95466800  |
| C                  | -3.92880500 | -0.70980700 | 1.36951500  | C                  | -4.00190100 | -1.90855600 | -0.23477100 |
| H                  | -4.71258600 | -1.45229200 | 1.20222000  | H                  | -5.03960900 | -1.77413600 | 0.08266100  |
| H                  | -3.52015300 | -0.85776500 | 2.37075800  | H                  | -3.99642800 | -2.27326400 | -1.26413900 |
| H                  | -4.38148000 | 0.28471700  | 1.32657100  | H                  | -3.54832700 | -2.67372800 | 0.40138500  |
| C                  | -2.24361200 | -2.29365100 | 0.34163900  | C                  | -3.91834500 | 0.49676200  | -1.00189400 |
| H                  | -1.88951200 | -2.54260100 | 1.34369300  | H                  | -3.97256800 | 0.17125200  | -2.04238400 |
| H                  | -3.01860600 | -3.01146900 | 0.06080300  | H                  | -4.93325700 | 0.68018100  | -0.63897300 |
| H                  | -1.40450600 | -2.38844600 | -0.35130900 | H                  | -3.35738600 | 1.43276400  | -0.96131500 |
| N                  | -1.72826800 | 0.11468400  | 0.63094200  | N                  | -1.84424000 | -0.78031500 | -0.62883900 |
| O                  | -1.03123800 | 0.07043500  | 1.69098200  | O                  | -1.57553500 | -1.02285800 | -1.84563500 |
| <b>IM1-PT12-1W</b> |             |             |             | <b>IM1-PT11-2W</b> |             |             |             |
| C                  | 2.91141600  | -0.03118500 | 0.03294400  | C                  | 2.57891000  | -1.55275300 | -0.06005400 |
| C                  | 3.08277700  | 1.26867500  | -0.25072400 | C                  | 2.98315600  | -0.28105800 | -0.16526000 |
| C                  | 1.92108800  | 2.15715100  | -0.34443400 | C                  | 2.01429200  | 0.81008900  | -0.03768700 |
| C                  | 0.52080800  | 1.53655900  | -0.05860000 | C                  | 0.57288700  | 0.47463000  | 0.20884400  |
| C                  | 0.43848000  | 0.11895800  | 0.28887300  | C                  | 0.15418400  | -0.81781900 | 0.29155400  |
| C                  | 1.57304300  | -0.65311000 | 0.24898800  | C                  | 1.12754000  | -1.91673600 | 0.19228700  |
| H                  | 4.06208400  | 1.69752000  | -0.41895700 | H                  | 4.01412100  | -0.00310400 | -0.34302900 |
| H                  | -0.10322300 | -3.95846800 | -1.28508300 | H                  | 1.04185700  | 4.50173800  | 0.07687200  |

|                    |             |             |             |                    |             |             |             |
|--------------------|-------------|-------------|-------------|--------------------|-------------|-------------|-------------|
| Cl                 | 4.29087900  | -1.08438200 | 0.14535000  | Cl                 | 3.68791700  | -2.86978800 | -0.19629000 |
| O                  | 2.02085700  | 3.33259500  | -0.61860300 | O                  | 2.35630700  | 1.98268700  | -0.12676700 |
| O                  | -0.45513600 | 2.26059200  | -0.13468100 | O                  | -0.27630600 | 1.48196800  | 0.33708900  |
| O                  | 1.63097500  | -1.96565500 | 0.41939400  | O                  | 0.81720700  | -3.08668600 | 0.31487500  |
| C                  | -2.86678700 | 0.99997200  | 1.22707600  | C                  | -3.09741100 | 0.28673700  | 1.27690300  |
| C                  | -1.63293400 | 0.31346200  | 1.85456100  | C                  | -2.01827000 | -0.71856800 | 1.74304300  |
| C                  | -0.90785500 | -0.44209700 | 0.71051900  | C                  | -1.29843700 | -1.20567600 | 0.46025700  |
| C                  | -3.22800300 | 0.18721000  | -0.03014000 | C                  | -3.43501100 | -0.09171500 | -0.17543000 |
| H                  | -2.61474900 | 2.01980500  | 0.94354600  | H                  | -2.69181400 | 1.29849600  | 1.30062800  |
| H                  | -1.93405500 | -0.41194400 | 2.61352100  | H                  | -2.47170000 | -1.57578900 | 2.24457600  |
| H                  | -0.97778200 | 1.03645000  | 2.33874600  | H                  | -1.32552100 | -0.25979000 | 2.44858800  |
| H                  | -0.76723900 | -1.48385000 | 1.00457000  | H                  | -1.33483300 | -2.29497200 | 0.39046800  |
| H                  | -3.70588500 | 1.03189400  | 1.92488900  | H                  | -3.98288600 | 0.25845300  | 1.91533900  |
| C                  | -4.23336200 | -0.94030200 | 0.26810000  | C                  | -4.51466500 | -1.18631800 | -0.26358100 |
| H                  | -5.20862600 | -0.50896000 | 0.50692500  | H                  | -5.48606800 | -0.78234300 | 0.03458500  |
| H                  | -4.34289800 | -1.59028400 | -0.60208800 | H                  | -4.58946200 | -1.55406100 | -1.28908500 |
| H                  | -3.91373300 | -1.55123800 | 1.11719800  | H                  | -4.28453000 | -2.03422900 | 0.38768700  |
| C                  | -3.70376400 | 1.05270200  | -1.19896400 | C                  | -3.80206400 | 1.10612100  | -1.05109500 |
| H                  | -3.85443800 | 0.44146100  | -2.09092400 | H                  | -3.92970100 | 0.79218100  | -2.08876100 |
| H                  | -4.65267800 | 1.53014900  | -0.94098100 | H                  | -4.73825100 | 1.55099000  | -0.70293100 |
| H                  | -2.97027300 | 1.82934300  | -1.42140900 | H                  | -3.01691800 | 1.86388400  | -1.01428200 |
| N                  | -1.91722600 | -0.43838300 | -0.38208300 | N                  | -2.13431500 | -0.65990000 | -0.63844200 |
| O                  | -1.80199200 | -1.19318300 | -1.40602300 | O                  | -1.93052700 | -0.99131900 | -1.84678900 |
| O                  | -0.35682200 | -3.29732500 | -0.63374200 | O                  | 0.14636000  | 4.11698000  | 0.17178100  |
| H                  | -0.91369800 | -2.61957200 | -1.09216200 | H                  | -0.32118200 | 4.65460100  | 0.81728500  |
| H                  | 0.82031900  | -2.46328900 | 0.10590300  | H                  | 0.11424300  | 2.39190000  | 0.23804600  |
|                    |             |             |             | O                  | 2.81442300  | 4.76295100  | -0.10863900 |
|                    |             |             |             | H                  | 3.22045800  | 5.20402100  | -0.86083000 |
|                    |             |             |             | H                  | 3.01742000  | 3.81945300  | -0.20021300 |
| <b>IM1-PT12-2W</b> |             |             |             | <b>IM1-PT11-TS</b> |             |             |             |
| C                  | -2.80918400 | -0.64076600 | 0.12640100  | C                  | -2.51143200 | -0.15824900 | 0.18873600  |
| C                  | -2.85978700 | -1.87343000 | -0.39922300 | C                  | -2.33296100 | 1.03400000  | 0.79406600  |
| C                  | -1.61837600 | -2.60626500 | -0.66540800 | C                  | -1.18937400 | 1.90227900  | 0.47927200  |
| C                  | -0.27977800 | -1.91497400 | -0.26860100 | C                  | -0.44567200 | 1.43475300  | -0.74338900 |
| C                  | -0.32904000 | -0.58695100 | 0.33618200  | C                  | -0.36177300 | 0.06845000  | -1.15849800 |
| C                  | -1.53417900 | 0.06407600  | 0.45084900  | C                  | -1.52894800 | -0.77314100 | -0.80455000 |
| H                  | -3.79563100 | -2.35964800 | -0.64193200 | H                  | -3.02781300 | 1.40466600  | 1.53789800  |
| H                  | -0.32706800 | 3.78905000  | -0.28560900 | H                  | -0.00880100 | 1.06468200  | -2.23469300 |
| Cl                 | -4.28555400 | 0.22593400  | 0.44451600  | Cl                 | -3.88889900 | -1.12950500 | 0.56496900  |
| O                  | -1.61095700 | -3.71173400 | -1.16075000 | O                  | -0.87785800 | 2.89488500  | 1.10285600  |
| O                  | 0.75928300  | -2.51566300 | -0.47805900 | O                  | 0.03736000  | 2.20512800  | -1.63326600 |
| O                  | -1.71543800 | 1.30486400  | 0.86497100  | O                  | -1.72685900 | -1.87562800 | -1.26673400 |
| C                  | 3.09387600  | -1.24563900 | 1.03614100  | C                  | 3.03031400  | 0.54462700  | -0.60017000 |
| C                  | 1.81029200  | -0.84905800 | 1.80013700  | C                  | 2.25437800  | -0.12993200 | -1.74818600 |
| C                  | 0.96598600  | 0.02484500  | 0.83683900  | C                  | 0.98463500  | -0.70928600 | -1.09936500 |
| C                  | 3.31364800  | -0.16412000 | -0.03715400 | C                  | 2.75644700  | -0.32468800 | 0.64291000  |

|                    |             |             |             |                    |             |             |             |
|--------------------|-------------|-------------|-------------|--------------------|-------------|-------------|-------------|
| H                  | 2.95058100  | -2.21235900 | 0.55725600  | H                  | 2.65343600  | 1.55754000  | -0.43348300 |
| H                  | 2.05091600  | -0.25714800 | 2.68613000  | H                  | 2.83652300  | -0.95617300 | -2.16351700 |
| H                  | 1.26053200  | -1.72743500 | 2.13561400  | H                  | 2.04590700  | 0.55718300  | -2.56719500 |
| H                  | 0.72867600  | 0.96997000  | 1.32794700  | H                  | 0.72736700  | -1.68671900 | -1.51282900 |
| H                  | 3.95491700  | -1.31378500 | 1.70410500  | H                  | 4.09762300  | 0.62230100  | -0.81458000 |
| C                  | 4.17613100  | 1.00441200  | 0.47464900  | C                  | 3.75276500  | -1.48877000 | 0.78067400  |
| H                  | 5.20707700  | 0.66906800  | 0.61347600  | H                  | 4.74048000  | -1.10757500 | 1.05366500  |
| H                  | 4.16917000  | 1.82372800  | -0.24690800 | H                  | 3.41925300  | -2.17701000 | 1.56023100  |
| H                  | 3.80951500  | 1.38546800  | 1.43211400  | H                  | 3.84800400  | -2.05001300 | -0.15236800 |
| C                  | 3.86227800  | -0.71567400 | -1.35469900 | C                  | 2.67576500  | 0.47627600  | 1.94315300  |
| H                  | 3.90628300  | 0.07189000  | -2.10953700 | H                  | 2.37329500  | -0.16726500 | 2.77057000  |
| H                  | 4.87156800  | -1.10634300 | -1.20005500 | H                  | 3.65470900  | 0.90494200  | 2.17248300  |
| H                  | 3.22758400  | -1.52312100 | -1.72384800 | H                  | 1.95478000  | 1.29320000  | 1.86232600  |
| N                  | 1.92497000  | 0.34105800  | -0.25584300 | N                  | 1.40817000  | -0.89090300 | 0.30910000  |
| O                  | 1.68169800  | 1.24945400  | -1.11826800 | O                  | 0.62166600  | -1.35935600 | 1.18531800  |
| O                  | -1.16679800 | 5.25123100  | -1.04935900 |                    |             |             |             |
| H                  | -1.06248800 | 6.13365200  | -0.67888600 |                    |             |             |             |
| H                  | -2.08741500 | 5.18333400  | -1.32324900 |                    |             |             |             |
| O                  | 0.06050400  | 3.01685500  | 0.16425900  |                    |             |             |             |
| H                  | -0.95866500 | 1.94942500  | 0.65546600  |                    |             |             |             |
| H                  | 0.65655100  | 2.55718900  | -0.46697600 |                    |             |             |             |
| <b>IM1-PT12-TS</b> |             |             |             | <b>IM2-PT11-TS</b> |             |             |             |
| C                  | 2.39914400  | -0.35350400 | -0.22846000 | C                  | -3.60332800 | 0.11576700  | 0.00525400  |
| C                  | 2.40517500  | 0.81970300  | -0.88733700 | C                  | -2.95520600 | 1.29227400  | 0.02107000  |
| C                  | 1.49233100  | 1.93409600  | -0.52089300 | C                  | -1.47720100 | 1.36982300  | 0.13511200  |
| C                  | 0.34984100  | 1.67214500  | 0.52829400  | C                  | -0.86538000 | 0.04285000  | 0.19224000  |
| C                  | 0.35045900  | 0.34878200  | 1.17038800  | C                  | -1.40455200 | -1.16764300 | 0.20663100  |
| C                  | 1.51383500  | -0.47515500 | 0.92313400  | C                  | -2.88453500 | -1.23283700 | 0.09711300  |
| H                  | 3.12431700  | 1.02770700  | -1.67052100 | H                  | -3.47610000 | 2.23933700  | -0.04570300 |
| H                  | 0.88849000  | -0.32785100 | 2.39387600  | H                  | 0.19331100  | -1.27441600 | 0.43848900  |
| Cl                 | 3.50665400  | -1.63934700 | -0.55903200 | Cl                 | -5.33487000 | 0.05621900  | -0.13027400 |
| O                  | 1.59761900  | 3.01542400  | -1.05010500 | O                  | -0.88124200 | 2.43534700  | 0.18034600  |
| O                  | -0.46984500 | 2.54731500  | 0.70813700  | O                  | 0.57749000  | -0.18861000 | 0.43754400  |
| O                  | 1.76219700  | -1.17604700 | 1.95877000  | O                  | -3.51834000 | -2.26281400 | 0.07432400  |
| C                  | -3.06231900 | 0.61910900  | 0.43065000  | C                  | 3.31900100  | 1.34394400  | 0.46959100  |
| C                  | -2.24241300 | 0.25647200  | 1.68988600  | C                  | 2.14371600  | 1.51228100  | -0.51605900 |
| C                  | -0.97859200 | -0.45540100 | 1.17151800  | C                  | 1.58937300  | 0.10967900  | -0.66026700 |
| C                  | -2.72100600 | -0.44803300 | -0.62911500 | C                  | 3.90580500  | -0.05430400 | 0.17949700  |
| H                  | -2.76074800 | 1.60474000  | 0.07306700  | H                  | 2.94818600  | 1.38623700  | 1.49622500  |
| H                  | -2.79771000 | -0.43369400 | 2.32946300  | H                  | 2.49536500  | 1.83579300  | -1.50030000 |
| H                  | -2.00160100 | 1.14088800  | 2.27507600  | H                  | 1.38365700  | 2.21559500  | -0.18049600 |
| H                  | -0.79979600 | -1.38995900 | 1.71008100  | H                  | 1.08522400  | -0.14566700 | -1.59211800 |
| H                  | -4.13373100 | 0.64846900  | 0.63687400  | H                  | 4.06693900  | 2.12909500  | 0.35296800  |
| C                  | -3.61224200 | -1.69843500 | -0.52045400 | C                  | 5.02194800  | -0.02869400 | -0.87559400 |
| H                  | -4.62893900 | -1.45969300 | -0.84327900 | H                  | 5.92030400  | 0.43113300  | -0.45665000 |
| H                  | -3.22341600 | -2.49575100 | -1.15751200 | H                  | 5.26676100  | -1.04574400 | -1.18853500 |

|                    |             |             |             |                    |             |             |             |
|--------------------|-------------|-------------|-------------|--------------------|-------------|-------------|-------------|
| H                  | -3.65902200 | -2.07048800 | 0.50643400  | H                  | 4.72604600  | 0.54052000  | -1.76062600 |
| C                  | -2.70662000 | 0.08824100  | -2.06075900 | C                  | 4.35413200  | -0.80478100 | 1.43483400  |
| H                  | -2.34829300 | -0.67596500 | -2.75303100 | H                  | 4.65820400  | -1.82256200 | 1.18389400  |
| H                  | -3.71782300 | 0.37923400  | -2.35607900 | H                  | 5.20400200  | -0.28993800 | 1.88998800  |
| H                  | -2.06006800 | 0.96455500  | -2.14505600 | H                  | 3.54719300  | -0.85584500 | 2.16930200  |
| N                  | -1.33291200 | -0.81924500 | -0.21585300 | N                  | 2.71090400  | -0.74783500 | -0.41466700 |
| O                  | -0.55121600 | -1.53127900 | -0.91505100 | O                  | 2.67643400  | -1.99074700 | -0.67041800 |
| <b>IM2-PT12-TS</b> |             |             |             | <b>IM3-PT11-TS</b> |             |             |             |
| C                  | -3.60240900 | 0.16990600  | 0.00910600  | C                  | 1.80128700  | 1.10630900  | 0.04176200  |
| C                  | -3.00257000 | 1.36506400  | -0.08138600 | C                  | 2.98660600  | 0.67482200  | 0.51775700  |
| C                  | -1.51162900 | 1.48429700  | -0.12783800 | C                  | 3.40516300  | -0.72003600 | 0.32531200  |
| C                  | -0.69831100 | 0.20258900  | -0.02536300 | C                  | 2.38583500  | -1.53749300 | -0.44710100 |
| C                  | -1.31482700 | -1.00597100 | 0.04321800  | C                  | 1.15535800  | -1.06620800 | -0.95246100 |
| C                  | -2.73186200 | -1.00897300 | 0.06528900  | C                  | 0.81863000  | 0.21870100  | -0.66348800 |
| H                  | -3.55182000 | 2.29618900  | -0.13424700 | H                  | 3.68329500  | 1.34141600  | 1.00745900  |
| H                  | -1.91551600 | -2.42058700 | 0.13806000  | H                  | 1.37524200  | -2.57370700 | -1.20543100 |
| Cl                 | -5.32631900 | -0.03266300 | 0.06006800  | Cl                 | 1.42749600  | 2.81256100  | 0.16463900  |
| O                  | -0.99643700 | 2.57270700  | -0.25826300 | O                  | 4.45821300  | -1.17762400 | 0.71628200  |
| O                  | 0.61001400  | 0.44247100  | -0.02674900 | O                  | 2.47567800  | -2.78597100 | -0.68779800 |
| O                  | -3.13116400 | -2.22029000 | 0.14443000  | O                  | -0.34738800 | 0.74489300  | -1.10185100 |
| C                  | 3.21245100  | -0.21738600 | -1.52110200 | C                  | -3.29650800 | -0.01359700 | -1.10543400 |
| C                  | 2.02691000  | -1.16159400 | -1.23346400 | C                  | -2.65855600 | 1.38654200  | -0.97477200 |
| C                  | 1.51649500  | -0.69335200 | 0.12324500  | C                  | -1.40219200 | 1.13532000  | -0.16164400 |
| C                  | 3.86180300  | 0.05520000  | -0.14520400 | C                  | -2.97405000 | -0.74389300 | 0.21913600  |
| H                  | 2.84387200  | 0.71801600  | -1.94838900 | H                  | -2.83969900 | -0.54699400 | -1.94126100 |
| H                  | 2.35850900  | -2.19966600 | -1.14269900 | H                  | -3.30702100 | 2.07026200  | -0.42087000 |
| H                  | 1.24757600  | -1.12515300 | -1.99430900 | H                  | -2.42219300 | 1.84274800  | -1.93555100 |
| H                  | 1.01873400  | -1.44342600 | 0.73482900  | H                  | -1.04707500 | 1.95956900  | 0.45291900  |
| H                  | 3.92502500  | -0.64927700 | -2.22553600 | H                  | -4.37140700 | 0.03767000  | -1.28526400 |
| C                  | 4.98580000  | -0.93756000 | 0.18906700  | C                  | -4.07691200 | -0.57415300 | 1.27570100  |
| H                  | 5.86176800  | -0.73719300 | -0.43327500 | H                  | -4.95895100 | -1.15277300 | 0.98986100  |
| H                  | 5.27351800  | -0.83643600 | 1.23748200  | H                  | -3.72650700 | -0.93337800 | 2.24558900  |
| H                  | 4.67175700  | -1.97085600 | 0.01865600  | H                  | -4.37227800 | 0.47295800  | 1.38320500  |
| C                  | 4.33853400  | 1.49960200  | 0.02815600  | C                  | -2.61606500 | -2.21968400 | 0.03140200  |
| H                  | 4.69514500  | 1.66091200  | 1.04730100  | H                  | -2.31623900 | -2.66344800 | 0.98263600  |
| H                  | 5.15794100  | 1.70833200  | -0.66493800 | H                  | -3.48526400 | -2.76400300 | -0.34737700 |
| H                  | 3.52663800  | 2.20314100  | -0.16814300 | H                  | -1.79303600 | -2.33378400 | -0.67669800 |
| N                  | 2.70856800  | -0.20354900 | 0.77777300  | N                  | -1.76419800 | 0.01692500  | 0.68099600  |
| O                  | 2.76658400  | -0.01174000 | 2.03149600  | O                  | -1.02506400 | -0.35233900 | 1.64185900  |
| <b>IM3-PT12-TS</b> |             |             |             | <b>IM1-PT11-1W</b> |             |             |             |
| C                  | 1.82050800  | 1.15236800  | 0.05311900  | C                  | -2.86373700 | -0.16584400 | 0.27041400  |
| C                  | 2.93910700  | 0.63736200  | 0.59442100  | C                  | -2.77848600 | 1.15590400  | 0.48211100  |
| C                  | 3.25799100  | -0.80039000 | 0.42006400  | C                  | -1.53584200 | 1.89635800  | 0.21286700  |
| C                  | 2.35815600  | -1.64505200 | -0.57720600 | C                  | -0.40714800 | 1.11023100  | -0.45247400 |
| C                  | 1.09546500  | -1.01857000 | -1.01640300 | C                  | -0.42926800 | -0.32589200 | -0.50769600 |
| C                  | 0.95328200  | 0.25606400  | -0.67951100 | C                  | -1.66763300 | -1.01762400 | -0.09553900 |

|                    |             |             |             |                    |             |             |             |
|--------------------|-------------|-------------|-------------|--------------------|-------------|-------------|-------------|
| H                  | 3.63221500  | 1.23557600  | 1.17089000  | H                  | -3.61949900 | 1.73969000  | 0.83605000  |
| H                  | -0.28843000 | -0.37355900 | -1.67142000 | H                  | -0.18113200 | -0.26825500 | -2.03063800 |
| Cl                 | 1.42704600  | 2.85408700  | 0.19424600  | Cl                 | -4.35634800 | -1.01463300 | 0.51684200  |
| O                  | 4.18655000  | -1.31893000 | 0.99701300  | O                  | -1.42192600 | 3.08102100  | 0.44026700  |
| O                  | 2.76255200  | -2.72708500 | -0.93405900 | O                  | 0.46774800  | 1.77594500  | -1.07513100 |
| O                  | -0.31606700 | 0.68722400  | -1.31897000 | O                  | -1.75045600 | -2.23099100 | -0.02511400 |
| C                  | -3.20967500 | -0.52474200 | -1.09807400 | C                  | 3.12300300  | -0.63237900 | -0.91733500 |
| C                  | -2.76386400 | 0.93055600  | -1.36282000 | C                  | 1.93751900  | -1.60986600 | -1.04533100 |
| C                  | -1.54219700 | 1.09757700  | -0.48217800 | C                  | 0.85976300  | -1.09392300 | -0.06442500 |
| C                  | -2.86098200 | -0.79966100 | 0.38286700  | C                  | 3.10744900  | -0.15200300 | 0.54654100  |
| H                  | -2.65802000 | -1.21266700 | -1.74442400 | H                  | 2.98469000  | 0.22472300  | -1.58068600 |
| H                  | -3.52260800 | 1.64402600  | -1.03118700 | H                  | 2.23829300  | -2.60996300 | -0.72444600 |
| H                  | -2.54627200 | 1.14060200  | -2.41015700 | H                  | 1.58163200  | -1.69765900 | -2.06875500 |
| H                  | -1.27991300 | 2.09447000  | -0.14285200 | H                  | 0.45924500  | -1.93999100 | 0.49721300  |
| H                  | -4.27181200 | -0.66932500 | -1.29737200 | H                  | 4.07269400  | -1.10233400 | -1.17997500 |
| C                  | -4.01456300 | -0.46120400 | 1.33837300  | C                  | 3.88054100  | -1.09542100 | 1.48553700  |
| H                  | -4.81021700 | -1.20294000 | 1.23639200  | H                  | 4.95399700  | -1.01898400 | 1.29253700  |
| H                  | -3.65988600 | -0.47346900 | 2.37070200  | H                  | 3.69622700  | -0.82177500 | 2.52668400  |
| H                  | -4.43585500 | 0.52644900  | 1.13206500  | H                  | 3.58147600  | -2.13773100 | 1.34760600  |
| C                  | -2.33066600 | -2.21193500 | 0.63681400  | C                  | 3.57283900  | 1.29339300  | 0.72302600  |
| H                  | -2.02739700 | -2.32099900 | 1.67970800  | H                  | 3.46696300  | 1.60575400  | 1.76307100  |
| H                  | -3.11568200 | -2.94289600 | 0.42672000  | H                  | 4.62506800  | 1.37654700  | 0.43806000  |
| H                  | -1.46872900 | -2.43000000 | 0.00259800  | H                  | 2.98385400  | 1.97074100  | 0.10198900  |
| N                  | -1.75765000 | 0.20104100  | 0.60724300  | N                  | 1.64839200  | -0.25441700 | 0.86393000  |
| O                  | -1.09790900 | 0.28175700  | 1.68959800  | O                  | 1.09652100  | 0.39430200  | 1.79781400  |
|                    |             |             |             | O                  | 0.41059800  | 0.22182100  | -2.89962300 |
|                    |             |             |             | H                  | -0.18698400 | 0.53744100  | -3.59095300 |
|                    |             |             |             | H                  | 0.64877200  | 1.05708400  | -2.19346200 |
| <b>IM1-PT12-1W</b> |             |             |             | <b>IM1-PT11-2W</b> |             |             |             |
| C                  | -2.53657800 | 0.05457700  | -0.55559500 | C                  | 2.65305000  | -0.92593100 | -0.19278900 |
| C                  | -2.64788200 | -1.28209100 | -0.50664700 | C                  | 2.85129000  | 0.05371300  | -1.08667000 |
| C                  | -1.67796800 | -2.09639600 | 0.24821000  | C                  | 1.84203300  | 1.10096400  | -1.28072000 |
| C                  | -0.36484900 | -1.39915900 | 0.70429500  | C                  | 0.46457600  | 0.93159700  | -0.59144800 |
| C                  | -0.35263700 | 0.06327800  | 0.75510600  | C                  | 0.32873500  | -0.05611300 | 0.41959200  |
| C                  | -1.47080400 | 0.78429500  | 0.18967300  | C                  | 1.39303800  | -1.04692000 | 0.64473200  |
| H                  | -3.47359100 | -1.80559700 | -0.97314500 | H                  | 3.76664300  | 0.14064300  | -1.65957500 |
| H                  | -0.63286800 | 0.74393700  | 2.14814600  | H                  | 0.65892700  | 2.97129000  | 1.38804200  |
| Cl                 | -3.70276000 | 1.02794600  | -1.39233000 | Cl                 | 3.86987500  | -2.12772500 | 0.09231800  |
| O                  | -1.87040600 | -3.26987200 | 0.47504300  | O                  | 2.06338600  | 2.09110700  | -1.94969300 |
| O                  | 0.58738500  | -2.10425100 | 0.98428500  | O                  | -0.41200600 | 1.77562800  | -0.87575700 |
| O                  | -1.64105300 | 2.01301100  | 0.42203400  | O                  | 1.32642700  | -1.92215100 | 1.49188100  |
| C                  | 3.21236000  | -0.37369500 | 0.79620700  | C                  | -3.19647400 | 0.66758400  | 0.42072400  |
| C                  | 2.15051900  | 0.42470000  | 1.58929700  | C                  | -2.06437200 | 0.52592500  | 1.46260900  |
| C                  | 1.01713900  | 0.75247200  | 0.58882600  | C                  | -1.05947000 | -0.49768200 | 0.87905900  |
| C                  | 3.04965700  | 0.03594500  | -0.67923100 | C                  | -3.23840300 | -0.66959500 | -0.33807700 |
| H                  | 3.00987100  | -1.43885600 | 0.90173200  | H                  | -2.94746700 | 1.46582600  | -0.27985800 |

|                    |             |             |             |                    |             |             |             |
|--------------------|-------------|-------------|-------------|--------------------|-------------|-------------|-------------|
| H                  | 2.57810200  | 1.35668900  | 1.97108500  | H                  | -2.45496100 | 0.13981700  | 2.40725400  |
| H                  | 1.79203600  | -0.15701800 | 2.43807000  | H                  | -1.61038800 | 1.49153900  | 1.67854400  |
| H                  | 0.83058600  | 1.83098500  | 0.55568300  | H                  | -0.89001200 | -1.30749600 | 1.59278400  |
| H                  | 4.22342000  | -0.17480100 | 1.15668100  | H                  | -4.15680100 | 0.89994000  | 0.88636700  |
| C                  | 3.87426500  | 1.28418200  | -1.04352500 | C                  | -4.09100800 | -1.73266500 | 0.37917300  |
| H                  | 4.93980500  | 1.03997100  | -1.05169700 | H                  | -5.15113800 | -1.47069100 | 0.31975000  |
| H                  | 3.59191800  | 1.64466000  | -2.03496700 | H                  | -3.94612000 | -2.70721000 | -0.09207700 |
| H                  | 3.71750800  | 2.09527900  | -0.32636700 | H                  | -3.82026000 | -1.82118500 | 1.43499300  |
| C                  | 3.32214500  | -1.10457900 | -1.66023500 | C                  | -3.66284300 | -0.52679400 | -1.79962400 |
| H                  | 3.09176600  | -0.79326100 | -2.68082400 | H                  | -3.56941900 | -1.48276600 | -2.31804900 |
| H                  | 4.37587000  | -1.39172000 | -1.61216800 | H                  | -4.70440100 | -0.19851700 | -1.85515400 |
| H                  | 2.71265700  | -1.97690300 | -1.41626100 | H                  | -3.03675100 | 0.20610600  | -2.31289800 |
| N                  | 1.60045600  | 0.39145400  | -0.72307600 | N                  | -1.80529800 | -1.07258000 | -0.27482600 |
| O                  | 0.97761700  | 0.63251600  | -1.80066800 | O                  | -1.33383300 | -2.03223500 | -0.95856700 |
| O                  | -0.93799600 | 1.69004700  | 2.70291000  | O                  | 0.36777200  | 3.87534900  | 0.42652100  |
| H                  | -0.16064700 | 2.12144500  | 3.08057100  | H                  | -0.33284100 | 4.51242900  | 0.60456300  |
| H                  | -1.22927100 | 2.13714000  | 1.74748700  | H                  | 0.06966700  | 3.29144400  | -0.33257800 |
|                    |             |             |             | O                  | 0.87980400  | 2.11813900  | 2.05259900  |
|                    |             |             |             | H                  | 1.77870400  | 2.15302900  | 2.40732700  |
|                    |             |             |             | H                  | 0.74251600  | 1.20397500  | 1.48969900  |
| <b>IM1-PT12-2W</b> |             |             |             | <b>IM1-PT11-CH</b> |             |             |             |
| C                  | -2.55571900 | -0.45866500 | -0.63707000 | C                  | 2.88127100  | -0.43184300 | -0.04831500 |
| C                  | -2.64710800 | -1.67235900 | -0.07546800 | C                  | 3.22203000  | 0.86092100  | 0.01981000  |
| C                  | -1.59421600 | -2.16626200 | 0.82673800  | C                  | 2.19483900  | 1.90757200  | 0.10397400  |
| C                  | -0.28642400 | -1.33303500 | 0.92541800  | C                  | 0.71099400  | 1.48083100  | 0.13924300  |
| C                  | -0.30775400 | 0.03218500  | 0.41735600  | C                  | 0.39311300  | 0.09384000  | 0.02907000  |
| C                  | -1.40988100 | 0.48534300  | -0.38639500 | C                  | 1.44918300  | -0.92015800 | -0.03536100 |
| H                  | -3.50339300 | -2.31656700 | -0.23372900 | H                  | 4.25344700  | 1.19121400  | 0.00799600  |
| H                  | -1.06315800 | 2.66612900  | 1.76617900  | H                  | -1.34226800 | 2.05288000  | -0.40930100 |
| Cl                 | -3.82434900 | 0.13621200  | -1.66682900 | Cl                 | 4.09185000  | -1.66849600 | -0.16198600 |
| O                  | -1.72757800 | -3.18942900 | 1.46197900  | O                  | 2.48692800  | 3.08243100  | 0.14297800  |
| O                  | 0.68721600  | -1.85548400 | 1.44511800  | O                  | -0.11463200 | 2.40206100  | 0.30488600  |
| O                  | -1.51718100 | 1.64851100  | -0.83971600 | O                  | 1.23516100  | -2.12231200 | -0.08995400 |
| C                  | 3.27195200  | -0.05962500 | 0.94227200  | C                  | -2.91426700 | -1.54280300 | 0.89980800  |
| C                  | 2.05984600  | 0.82557200  | 1.31985600  | C                  | -1.41372300 | -1.73299000 | 0.60647300  |
| C                  | 1.04269700  | 0.70218500  | 0.15837000  | C                  | -0.96115500 | -0.37520300 | 0.11642900  |
| C                  | 3.25548700  | -0.18218000 | -0.59115600 | C                  | -3.35723000 | -0.36227100 | 0.01288600  |
| H                  | 3.14269900  | -1.04718000 | 1.38450000  | H                  | -3.05784700 | -1.28368300 | 1.95148300  |
| H                  | 2.36001200  | 1.87113000  | 1.43186700  | H                  | -1.22527000 | -2.46521700 | -0.18187400 |
| H                  | 1.64344600  | 0.48636400  | 2.26892800  | H                  | -0.83874200 | -2.06403600 | 1.46966900  |
| H                  | 0.83973500  | 1.68741200  | -0.27085600 | H                  | -3.49597100 | -2.44199500 | 0.69464800  |
| H                  | 4.21306600  | 0.36197000  | 1.30137300  | C                  | -3.90363500 | -0.80274400 | -1.35311100 |
| C                  | 3.99866800  | 0.97436600  | -1.28516700 | H                  | -4.87709200 | -1.28029800 | -1.22029000 |
| H                  | 5.07512400  | 0.88698600  | -1.11420300 | H                  | -4.02722600 | 0.05842500  | -2.01171400 |
| H                  | 3.81290300  | 0.94644700  | -2.36101600 | H                  | -3.23336200 | -1.51614600 | -1.83904900 |
| H                  | 3.67264900  | 1.94756500  | -0.90637900 | C                  | -4.31776800 | 0.59908300  | 0.71296400  |

|                    |             |             |             |   |             |            |             |
|--------------------|-------------|-------------|-------------|---|-------------|------------|-------------|
| C                  | 3.75537800  | -1.53479100 | -1.09785600 | H | -4.55348900 | 1.45236800 | 0.07578800  |
| H                  | 3.62317600  | -1.60788400 | -2.17894300 | H | -5.24672100 | 0.07242200 | 0.94565700  |
| H                  | 4.81776600  | -1.65018900 | -0.86648900 | H | -3.88925300 | 0.96985200 | 1.64699100  |
| H                  | 3.20386300  | -2.34979600 | -0.62494000 | N | -2.03757300 | 0.31005000 | -0.20311900 |
| N                  | 1.79700000  | -0.05654400 | -0.87513200 | O | -2.06577600 | 1.48818100 | -0.88011400 |
| O                  | 1.30465200  | -0.26226600 | -2.02591500 |   |             |            |             |
| O                  | -1.01554900 | 1.74109500  | 2.43026200  |   |             |            |             |
| H                  | -0.32376300 | 1.79734500  | 3.10305800  |   |             |            |             |
| H                  | -0.77521900 | 0.94290900  | 1.74933100  |   |             |            |             |
| O                  | -1.08067500 | 3.51328300  | 0.79433200  |   |             |            |             |
| H                  | -1.19596900 | 2.87462900  | -0.00286500 |   |             |            |             |
| H                  | -1.81262100 | 4.14084300  | 0.78634000  |   |             |            |             |
| <b>IM1-PT11-CH</b> |             |             |             |   |             |            |             |
| C                  | 2.93587800  | -0.09230300 | -0.02890300 |   |             |            |             |
| C                  | 2.86163700  | 1.24296600  | 0.06034400  |   |             |            |             |
| C                  | 1.56451900  | 1.94767100  | 0.13873000  |   |             |            |             |
| C                  | 0.30053200  | 1.07296500  | 0.08991000  |   |             |            |             |
| C                  | 0.45667300  | -0.30173400 | 0.03114800  |   |             |            |             |
| C                  | 1.70920100  | -0.98963000 | -0.05682200 |   |             |            |             |
| H                  | 3.74399900  | 1.87036700  | 0.08423600  |   |             |            |             |
| Cl                 | 4.46682700  | -0.90274900 | -0.11584000 |   |             |            |             |
| O                  | 1.49569700  | 3.15241400  | 0.23895800  |   |             |            |             |
| O                  | -0.84154000 | 1.60389100  | 0.08345500  |   |             |            |             |
| O                  | 1.82248500  | -2.20843000 | -0.14461200 |   |             |            |             |
| C                  | -2.68111400 | -0.32047600 | 1.51234100  |   |             |            |             |
| C                  | -1.51078600 | -1.32524800 | 1.39461200  |   |             |            |             |
| C                  | -0.83516600 | -1.06392100 | 0.02995200  |   |             |            |             |
| C                  | -3.17741800 | -0.08917600 | 0.08265900  |   |             |            |             |
| H                  | -2.33448100 | 0.62343400  | 1.93220400  |   |             |            |             |
| H                  | -1.87534700 | -2.35400900 | 1.43290500  |   |             |            |             |
| H                  | -0.79199900 | -1.20194500 | 2.20274200  |   |             |            |             |
| H                  | -0.70776300 | -1.97395000 | -0.56187300 |   |             |            |             |
| H                  | -3.48341000 | -0.70658400 | 2.14365000  |   |             |            |             |
| C                  | -4.08185900 | -1.23617200 | -0.41940500 |   |             |            |             |
| H                  | -5.02678000 | -1.18758600 | 0.12506700  |   |             |            |             |
| H                  | -4.28775100 | -1.12339500 | -1.48517000 |   |             |            |             |
| H                  | -3.64100800 | -2.22061300 | -0.24819500 |   |             |            |             |
| C                  | -3.80788800 | 1.26909900  | -0.19380000 |   |             |            |             |
| H                  | -4.02435900 | 1.38798200  | -1.25729100 |   |             |            |             |
| H                  | -4.75021300 | 1.33354800  | 0.35545500  |   |             |            |             |
| H                  | -3.14593100 | 2.07142800  | 0.12594700  |   |             |            |             |
| N                  | -1.87829600 | -0.24386600 | -0.71190200 |   |             |            |             |
| O                  | -1.83516600 | -0.06651600 | -1.89550800 |   |             |            |             |
